# Supplementary material for: Effects of Glucomannan Supplementation on Type II Diabetes Mellitus in Humans: A Meta-Analysis
Source: MDPI journal article supplement (doi:10.3390/nu15030601), 2023-01-24
Supplement: s1 [file s1]

Supplementary information for

Effects of Glucomannan Supplementation on Type II Diabetes Mellitus in Humans: a Meta-Analysis

Zhanzhi Zhang<sup>1,2,†</sup>, Yu Zhang<sup>3,†</sup>, Xiaomei Tao<sup>4,†</sup>, Yuying Wang<sup>1,2</sup>, Benqiang Rao<sup>1,2\*</sup>, and Hanping Shi<sup>1,2\*</sup>

1 Department of General Surgery, Beijing Shijitan Hospital, Capital Medical University, Beijing, 100038, China

2 Key Laboratory of Cancer FSMP for State Market Regulation, Beijing, 100038, China

3 Department of VIP Medical Services, National Cancer Center/National clinical Research Center for Cancer/Cancer Hospital, Chinese Academy of Medical Sciences and Peking Union Medical College, Beijing 100021, China

4 Department of Pharmacy, Beijing Shijitan Hospital, Capital Medical University, Beijing, 100038, China

\* Correspondence: raobenqiang@bjsjth.cn (B.R.); shihp@ccmu.edu.cn (H.S.)

† These authors contributed equally to this work.

Egger's test results for:

### 1. TG

. metabias WMD sehMD, egger

Note: data input format **theta se\_theta** assumed

Egger's test for small-study effects:  
Regress standard normal deviate of intervention  
effect estimate against its standard error

Number of studies = 6 Root MSE = 2.123

| Std_Eff | Coefficient | Std. err. | t     | P> t  | [95% conf. interval] |          |
|---------|-------------|-----------|-------|-------|----------------------|----------|
| slope   | .0668407    | .3097372  | 0.22  | 0.840 | -.7931276            | .9268091 |
| bias    | -.2884644   | 2.139682  | -0.13 | 0.899 | -6.229173            | 5.652244 |

Test of H0: no small-study effects P = 0.899

### 2. TC

. metabias WMD sehMD, egger

Note: data input format **theta se\_theta** assumed

Egger's test for small-study effects:  
Regress standard normal deviate of intervention  
effect estimate against its standard error

Number of studies = 6 Root MSE = 2.124

| Std_Eff | Coefficient | Std. err. | t     | P> t  | [95% conf. interval] |          |
|---------|-------------|-----------|-------|-------|----------------------|----------|
| slope   | -.1069534   | .2111928  | -0.51 | 0.639 | -.6933186            | .4794118 |
| bias    | -1.949235   | 1.851461  | -1.05 | 0.352 | -7.089714            | 3.191244 |

Test of H0: no small-study effects P = 0.352

### 3. HDL

. metabias WMD sehMD, egger

Note: data input format **theta se\_theta** assumed

Egger's test for small-study effects:  
Regress standard normal deviate of intervention  
effect estimate against its standard error

Number of studies = 6 Root MSE = 1.045

| Std_Eff | Coefficient | Std. err. | t     | P> t  | [95% conf. interval] |          |
|---------|-------------|-----------|-------|-------|----------------------|----------|
| slope   | -.0198727   | .0323349  | -0.61 | 0.572 | -.1096486            | .0699033 |
| bias    | .0358645    | 1.005967  | 0.04  | 0.973 | -2.757148            | 2.828877 |

Test of H0: no small-study effects P = 0.973

### 4. LDL

```
. metabias WMD sehMD, egger
```

Note: data input format **theta se\_theta** assumed

Egger's test for small-study effects:  
Regress standard normal deviate of intervention  
effect estimate against its standard error

```
.
Number of studies = 5                                Root MSE      = 1.693
```

| Std_Eff | Coefficient | Std. err. | t     | P> t  | [95% conf. interval] |          |
|---------|-------------|-----------|-------|-------|----------------------|----------|
| slope   | -.0326876   | .1759782  | -0.19 | 0.864 | -.5927289            | .5273536 |
| bias    | -3.40185    | 2.086358  | -1.63 | 0.201 | -10.04157            | 3.237871 |

Test of H0: no small-study effects                      P = 0.201

## 5. FBG

```
. metabias WMD sehMD, egger
```

Note: data input format **theta se\_theta** assumed

Egger's test for small-study effects:  
Regress standard normal deviate of intervention  
effect estimate against its standard error

```
.
Number of studies = 5                                Root MSE      = .9195
```

| Std_Eff | Coefficient | Std. err. | t     | P> t  | [95% conf. interval] |           |
|---------|-------------|-----------|-------|-------|----------------------|-----------|
| slope   | .336673     | .3101145  | 1.09  | 0.357 | -.6502498            | 1.323596  |
| bias    | -4.134289   | 1.056561  | -3.91 | 0.030 | -7.496736            | -.7718422 |

Test of H0: no small-study effects                      P = 0.030

## 6. P2hBG

## 7. FINS

```
. metabias WMD seWMD, egger
```

Note: data input format **theta se\_theta** assumed

Egger's test for small-study effects:  
Regress standard normal deviate of intervention  
effect estimate against its standard error

```
.
Number of studies = 4                                Root MSE      = 1.74
```

| Std_Eff | Coefficient | Std. err. | t     | P> t  | [95% conf. interval] |          |
|---------|-------------|-----------|-------|-------|----------------------|----------|
| slope   | .3784644    | .9440902  | 0.40  | 0.727 | -3.683628            | 4.440557 |
| bias    | -4.149487   | 2.099595  | -1.98 | 0.187 | -13.18332            | 4.884343 |

Test of H0: no small-study effects                      P = 0.187

## 8. BW

```
. metabias WMD seWMD, egger
```

Note: data input format **theta se\_theta** assumed

Egger's test for small-study effects:  
Regress standard normal deviate of intervention  
effect estimate against its standard error

```
.
Number of studies = 3                                Root MSE      = .0463
```

| Std_Eff | Coefficient | Std. err. | t      | P> t  | [95% conf. interval] |          |
|---------|-------------|-----------|--------|-------|----------------------|----------|
| slope   | -.7905337   | .0627152  | -12.61 | 0.050 | -1.587405            | .0063378 |
| bias    | .0703693    | .0432554  | 1.63   | 0.351 | -.4792424            | .619981  |

Test of H0: no small-study effects                      P = 0.351
